# Supplementary material for: A Comparison of Two Measures of HIV Diversity in Multi-Assay Algorithms for HIV Incidence Estimation
Source: PubMed Central journal article supplement (PMC4072769; doi:10.1371/journal.pone.0101043), 2014-06-26
Supplement: pone.0101043.s001.pdf [file pone.0101043.s001.pdf]

Table S1. Source of samples used for analysis.

| <b>Study</b> | <b>Reference</b> | <b>Population enrolled</b> | <b>HIV status at enrollment</b>       | <b>Enrollment (years)</b>                            | <b>Follow-up interval</b> | <b>Length of follow-up</b>  | <b>HIV test method</b>       |
|--------------|------------------|----------------------------|---------------------------------------|------------------------------------------------------|---------------------------|-----------------------------|------------------------------|
| MACS         | Kaslow (22)      | MSM                        | Infected (42%)<br>Uninfected (58%)    | 1984-1985;<br>1987-1990;<br>2001-2003                | 6 months                  | Ongoing<br>(up to 29 years) | EIA / WB <sup>a</sup>        |
| ALIVE        | Vlahov (23)      | PWID                       | Uninfected                            | 1988-1989;<br>1994-1995;<br>1998; 2000;<br>2005-2008 | 6 months                  | Ongoing<br>(up to 25 years) | EIA / WB                     |
| JHHCC        | Moore (25)       | Various                    | Infected                              | 1989-present                                         | Various                   | Ongoing<br>(>24 years)      | SOC                          |
| HIVNET 001   | Celum (24)       | Various                    | Uninfected                            | 1995-1998                                            | 3 months                  | Up to 3 years               | EIA / WB <sup>b</sup>        |
| HPTN 061     | Koblin (28)      | Black MSM                  | Infected (25%)<br>Uninfected (75%)    | 2009-2010                                            | 6 months                  | 12 months                   | Rapid test / WB <sup>b</sup> |
| HPTN 064     | Hodder (27)      | Women                      | Infected (1.5%)<br>Uninfected (98.5%) | 2009-2010                                            | 6 months                  | 6 or 12 months              | Rapid test / WB <sup>b</sup> |

Abbreviations: MACS: Multicenter AIDS Cohort; ALIVE: AIDS Linked to the Intravenous Experience; JHHCC: Johns Hopkins Hospital Clinical Cohort; HIVNET: HIV Network for Prevention Trials; HPTN: HIV Prevention Trials Network; MSM: men who have sex with men; PWID: persons who inject drugs; SOC: standard of care; EIA: enzyme immunoassay; WB: Western blot.

<sup>a</sup> Some participants were enrolled in this study before HIV testing algorithms were available. For these participants, stored samples from their baseline visit were tested when the tests became available.

<sup>b</sup> Retrospective quality control testing was performed at a centralized reference laboratory. This analysis included testing for acute infection at the visit prior to seroconversion.
